# Supplementary material for: Priority stratification for colonoscopy based on two-sample faecal immunochemical test screening: results from a cross-sectional study at an endoscopy clinic in Japan
Source: PubMed Central journal article supplement — BMJ Open. 2021 May 19;11(5):e046055. doi: 10.1136/bmjopen-2020-046055 (PMC8137156; doi:10.1136/bmjopen-2020-046055), 2021-05-19
Supplement: bmjopen-2020-046055supp001.pdf [file bmjopen-2020-046055supp001.pdf]

**Supplementary Table 1. Details of the positive FIT groups**

|                                                   | <b>FIT (+/+)</b> | <b>FIT (+/-)</b>        | <b>FIT (+)</b>    | <b>FIT (+/?)</b>  |
|---------------------------------------------------|------------------|-------------------------|-------------------|-------------------|
| <b>No.</b>                                        | 264              | 1018                    | 136               | 287               |
| <b>Age, mean (SD), years</b>                      | 52.7 (13.7)      | 50.3 (11.9)             | 48.3 (12.1)       | 51.2 (12.2)       |
| <b>Male, n (%)</b>                                | 144 (54.5)       | 469 (46.1)              | 65 (47.8)         | 119 (41.5)        |
| <b>All cancers (including in situ), n</b>         | 32               | 19                      | 2                 | 6                 |
| <b>Detection rate</b>                             | 12.1%            | 1.9% <sup>a</sup>       | 1.5% <sup>a</sup> | 2.1% <sup>a</sup> |
| <b>Invasive cancers, n</b>                        | 22               | 3                       | 0                 | 4                 |
| <b>Detection rate</b>                             | 8.3%             | 0.3% <sup>a</sup>       | 0.0% <sup>a</sup> | 1.4% <sup>a</sup> |
| <b>Age ≥50 years</b>                              |                  |                         |                   |                   |
| <b>No.</b>                                        | 140              | 490                     | 54                | 145               |
| <b>All cancers (including in situ), n</b>         | 18               | 17                      | 2                 | 5                 |
| <b>Detection rate</b>                             | 12.9%            | 3.5% <sup>a</sup>       | 3.7%              | 3.4% <sup>b</sup> |
| <b>Invasive cancers, n</b>                        | 12               | 3                       | 0                 | 4                 |
| <b>Detection rate</b>                             | 8.6%             | 0.6% <sup>a</sup>       | 0.0% <sup>c</sup> | 2.8% <sup>c</sup> |
| <b>Age &lt;50 years</b>                           |                  |                         |                   |                   |
| <b>No.</b>                                        | 124              | 528                     | 82                | 142               |
| <b>All cancers (including in situ), n</b>         | 14               | 2                       | 0                 | 1                 |
| <b>Detection rate</b>                             | 11.3%            | 0.4% <sup>a</sup>       | 0.0% <sup>b</sup> | 0.7% <sup>a</sup> |
| <b>Invasive cancers, n</b>                        | 10               | 0                       | 0                 | 0                 |
| <b>Detection rate</b>                             | 8.1%             | 0.0% <sup>a</sup>       | 0.0% <sup>c</sup> | 0.0% <sup>b</sup> |
| <b>Features of cancers</b>                        |                  |                         |                   |                   |
| <b>Location (Proximal/Distal), n</b>              | 10/22            | 5/14                    | 1/1               | 0/6               |
| <b>Size (SD), mm</b>                              | 31.2 (22.7)      | 17.4 <sup>b</sup> (9.7) | 9.0 (8.5)         | 36.5 (42.0)       |
| <b>T stage (Tis/T1/T2/T3/T4), n</b>               | 10/7/4/10/1      | 16/1/2/0/0              | 2/0/0/0/0         | 2/2/0/1/1         |
| <b>Histological subtype (Well+Mod/Por+Muc), n</b> | 30/2             | 19/0                    | 2/0               | 6/0               |

Abbreviation: FIT, fecal immunochemical test. FIT (+/+) indicates 2-positive results for the 2-sample FIT. FIT (+/-) indicates a 1-positive result for the 2-sample FIT. FIT (+) indicates a 1-positive result for the 1-sample FIT. FIT (+/?) indicates positive FIT results with unknown number of positivity. SD: standard deviation. "Proximal" indicates from the cecum to the transverse colon and "Distal" indicates from the descending colon to the rectum. "T stage" of the tumor was based on the UICC TNM Classification. "Well+Mod" indicates well- and moderately-differentiated adenocarcinoma. "Por+Muc" indicates poorly-differentiated and mucinous adenocarcinoma.

<sup>a</sup>  $P < .001$ , vs. FIT (+/+).

<sup>b</sup>  $P < .01$ , vs. FIT (+/+).

<sup>c</sup>  $P < .05$ , vs. FIT (+/+).
